# Supplementary material for: The effects of natural selection across molecular pathways in Drosophila melanogaster
Source: PubMed Central journal article supplement (PMC4578789; doi:10.1186/s12862-015-0472-4), 2015-09-21
Supplement: 12862_2015_472_MOESM1_ESM.pdf [file 12862_2015_472_MOESM1_ESM.pdf]

RESEARCH

# Supplementary Material: The effects of natural selection across molecular pathways in *Drosophila melanogaster*

Jeffrey P. Vedanayagam<sup>†</sup> and Daniel Garrigan<sup>\*</sup>

---

\*Correspondence:

[dgarriga@ur.rochester.edu](mailto:dgarriga@ur.rochester.edu)

Department of Biology, University  
of Rochester, 14627 Rochester,  
New York, USA

Full list of author information is  
available at the end of the article

<sup>†</sup>[jvedanay@ur.rochester.edu](mailto:jvedanay@ur.rochester.edu)

**Table 1** The 26 RNAi knockdown phenotypes surveyed in this study. We identify phenotypes that are enriched for proteins that significantly deviate from the genome average in their direction of selection (DoS).

| RNAi knockdown phenotype               | RNAi ID | Ontology   | Total <sup>1</sup> | <i>n</i> <sup>2</sup> | Reference |
|----------------------------------------|---------|------------|--------------------|-----------------------|-----------|
| Whole-genome                           | –       | –          | –                  | 11148                 | –         |
| Lethals                                | –       | –          | –                  | 2853                  | –         |
| Akt-TOR signaling decrease             | GR00169 | GO:1902531 | 13900              | 24                    | [1]       |
| Akt-TOR signaling increase             | GR00169 | GO:1902531 | 13900              | 22                    | [1]       |
| <i>Blood</i> TE activity increase      | GR00284 | GO:0070894 | 8171               | 43                    | [2]       |
| <i>Burdock</i> TE activity increase    | GR00284 | GO:0070894 | 8171               | 15                    | [2]       |
| Cell size regulation                   | GR00001 | GO:0061387 | 13900              | 5                     | [3]       |
| CRY degradation                        | GR00006 | GO:0042752 | 13900              | 93                    | [4]       |
| Decreased cell number and viability    | GR00031 | GO:0061387 | 13071              | 96                    | [5]       |
| Hedgehog signaling decrease            | GR00045 | GO:0007166 | 5828               | 48                    | [6]       |
| Hedgehog signaling increase            | GR00045 | GO:0007166 | 5828               | 30                    | [6]       |
| <i>HeTA</i> TE activity increase       | GR00284 | GO:0070894 | 8171               | 38                    | [2]       |
| Hippo signaling decrease               | GR00218 | GO:1902531 | 13059              | 99                    | [7]       |
| Hippo signaling increase               | GR00218 | GO:1902531 | 13059              | 54                    | [7]       |
| Hypoxia induced transcription          | GR00170 | GO:0097411 | 13071              | 49                    | [8]       |
| Influenza replication decrease         | GR00086 | GO:0045087 | 13071              | 18                    | [9]       |
| Innate immunity                        | GR00041 | GO:0045087 | 13071              | 13                    | [10]      |
| JAK/STAT signaling decrease            | GR00044 | GO:1902531 | 12649              | 10                    | [11]      |
| JAK/STAT signaling increase            | GR00044 | GO:1902531 | 12649              | 6                     | [11]      |
| <i>M. fortuitum</i> infection decrease | GR00046 | GO:0045087 | 12740              | 27                    | [12]      |
| Notch signaling decrease               | GR00152 | GO:0007166 | 13900              | 16                    | [13]      |
| Notch signaling increase               | GR00152 | GO:0007166 | 13900              | 18                    | [13]      |
| RTK-Ras-ERK signaling decrease         | GR00214 | GO:1902531 | 13900              | 113                   | [14]      |
| RTK-Ras-ERK signaling increase         | GR00214 | GO:1902531 | 13900              | 55                    | [14]      |
| <i>TAHRE</i> TE activity increase      | GR00284 | GO:0070894 | 8171               | 41                    | [2]       |
| Toll signaling decrease                | GR00176 | GO:0007166 | 13900              | 17                    | [15]      |
| Toll signaling increase                | GR00176 | GO:0007166 | 13900              | 11                    | [15]      |
| Wnt signaling activity                 | GR00040 | GO:0007166 | 13071              | 90                    | [16]      |

<sup>1</sup> Total number of gene knockdowns assayed for effects on a given phenotype

<sup>2</sup> Number of genes significantly affecting the RNAi knockdown phenotype

**Table 2 Details of the 15 *Drosophila melanogaster* strains used in this study, including database accession numbers and identifiers [17], percent of the reference genome with reads mapped from that strain, and the average read depth across the entire genome assembly.**

| SRA accession | DPGP stock ID | Origin | % coverage | Read depth |
|---------------|---------------|--------|------------|------------|
| SRX058182     | FR14          | France | 96.12      | 34.36      |
| SRX058183     | FR151         | France | 96.63      | 34.95      |
| SRX058185     | FR207         | France | 97.73      | 34.84      |
| SRX058186     | FR217         | France | 96.73      | 35.66      |
| SRX058188     | FR310         | France | 97.67      | 33.78      |
| SRX058189     | FR361         | France | 96.56      | 35.89      |
| SRX058338     | RG10          | Rwanda | 96.88      | 34.30      |
| SRX058339     | RG11N         | Rwanda | 98.46      | 33.32      |
| SRX058182     | RG15          | Rwanda | 97.82      | 41.73      |
| SRX058346     | RG21N         | Rwanda | 94.72      | 32.88      |
| SRX058352     | RG32N         | Rwanda | 97.85      | 34.88      |
| SRX058354     | RG34          | Rwanda | 98.03      | 28.75      |
| SRX058355     | RG35          | Rwanda | 97.81      | 30.90      |
| SRX058357     | RG36          | Rwanda | 98.11      | 28.75      |
| SRX058359     | RG38N         | Rwanda | 96.26      | 34.05      |

## References

1. Kockel, L., Kerr, K.S., Melnick, M., Bruckner, K., Hebrok, M., Perrimon, N.: Dynamic switch of negative feedback regulation in *Drosophila* Akt-TOR signaling. *PLoS Genet* **6**, 1000990 (2010)
2. Czech, B., Preall, J.B., McGinn, J., Hannon, G.J.: A transcriptome-wide RNAi screen in the *Drosophila* ovary reveals factors of the germline piRNA pathway. *Mol Cell* **50**, 749–761 (2013)
3. Bjorklund, M., Taipale, M., Varjosalo, M., Saharinen, J., Lahdenpera, J., Taipale, J.: Identification of pathways regulating cell size and cell-cycle progression by RNAi. *Nature* **439**, 1009–1013 (2006)
4. Sathyanarayanan, S., Zheng, X.Z., Kumar, S., Chen, C.H., Chen, D.C., Hay, B., Sehgal, A.: Identification of novel genes involved in light-dependent CRY degradation through a genome-wide RNAi screen. *Genes Dev* **22**, 1522–1533 (2008)
5. Boutros, M., Kiger, A.A., Armknecht, S., Kerr, K., Hild, M., Koch, B., Haas, S.A., Paro, R., Perrimon, N., Consortium, H.F.A.: Genome-wide RNAi analysis of growth and viability in *Drosophila* cells. *Science* **303**, 832–835 (2004)
6. Lum, L., Yao, S.Q., Mozer, B., Rovescalli, A., Von Kessler, D., Nirenberg, M., Beachy, P.A.: Identification of hedgehog pathway components by RNAi in *Drosophila* cultured cells. *Science* **299**, 2039–2045 (2003)
7. Wehr, M.C., Holder, M.V., Gailite, I., Saunders, R.E., Maile, T.M., Ciirdaeva, E., Instrell, R., Jiang, M., Howell, M., Rossner, M.J., Tapon, N.: Salt-inducible kinases regulate growth through the Hippo signalling pathway in *Drosophila*. *Nat Cell Biol* **15**, 61–71 (2013)
8. Dekanty, A., Romero, N.M., Bertolin, A.P., Thomas, M.G., Leishman, C.C., Perez-Perri, J.I., Boccaccio, G.L., Wappner, P.: *Drosophila* genome-wide RNAi screen identifies multiple regulators of HIFdependent transcription in hypoxia. *PLoS Genet* **6**, 1000994 (2010)
9. Hao, L.H., Sakurai, A., Watanabe, T., Sorensen, E., Nidom, C.A., Newton, M.A., Ahlquist, P., Kawaoka, Y.: *Drosophila* RNAi screen identifies host genes important for influenza virus replication. *Nature* **454**, 890–893 (2008)
10. Foley, E., O'Farrell, P.H.: Functional dissection of an innate immune response by a genome-wide RNAi screen. *PLoS Biol* **2**, 203 (2004)
11. Muller, P., Kuttenukeuler, D., Gesellchen, V., Zeidler, M.P., Boutros, M.: Identification of JAK/STAT signalling components by genome-wide RNA interference. *Nature* **436**, 871–875 (2005)
12. Philips, J.A., Rubin, E.J., Perrimon, N.: *Drosophila* RNAi screen reveals CD36 family member required for mycobacterial infection. *Science* **309**, 1251–1253 (2005)
13. Mourikis, P., Lake, R.J., Firnhaber, C.B., DeDecker, B.S.: Modifiers of notch transcriptional activity identified by genome-wide RNAi. *BMC Dev Biol* **10**, 107 (2010)
14. Friedman, A.A., George, T., Rohit, S., Dong, Y., Arunachalam, V., Yanhui, H., Richard, B., Pengyu, H., Xiaoyun, S., Maura, P., Svetlana, P., Thilakam, M., L., F.R., M., A.J., Bonnie, B., Norbert, P.: Proteomic and functional genomic landscape of receptor tyrosine kinase and Ras to extracellular signalregulated kinase signaling. *Sci Signal* **4**, 10 (2011)
15. Kuttenukeuler, D., Pelte, N., Ragab, A., Gesellchen, V., Schneider, L., Blass, C., Axelsson, E., Huber, W., Boutros, M.: A large-scale RNAi screen identifies Deaf1 as a regulator of innate immune responses in *Drosophila*. *J Innate Immun* **2**, 181–194 (2010)
16. DasGupta, R., Nybakken, K., Booker, M., Mathey-Prevot, B., Gonsalves, F., Changkakoty, B., Perrimon, N.: A case study of the reproducibility of transcriptional reporter cell-based RNAi screens in *Drosophila*. *Genome Biol* **8**, 203 (2007)
17. Pool, J., Corbett-Detig, R., Sugino, R., Stevens, K., Cardeno, C., Crepeau, M., Duchon, P., Emerson, J., Saelao, P., Begun, D., Langley, C.: Population genomics of sub-Saharan *Drosophila melanogaster*: African diversity and non-African admixture. *PLoS Genet* **8**, 1003080 (2012)
